# Supplementary material for: Osteoporosis Pre-Screening Using Ensemble Machine Learning in Postmenopausal Korean Women
Source: MDPI journal article supplement (doi:10.3390/healthcare10061107), 2022-06-14
Supplement: s1 [file s1]

## Supplementary Materials

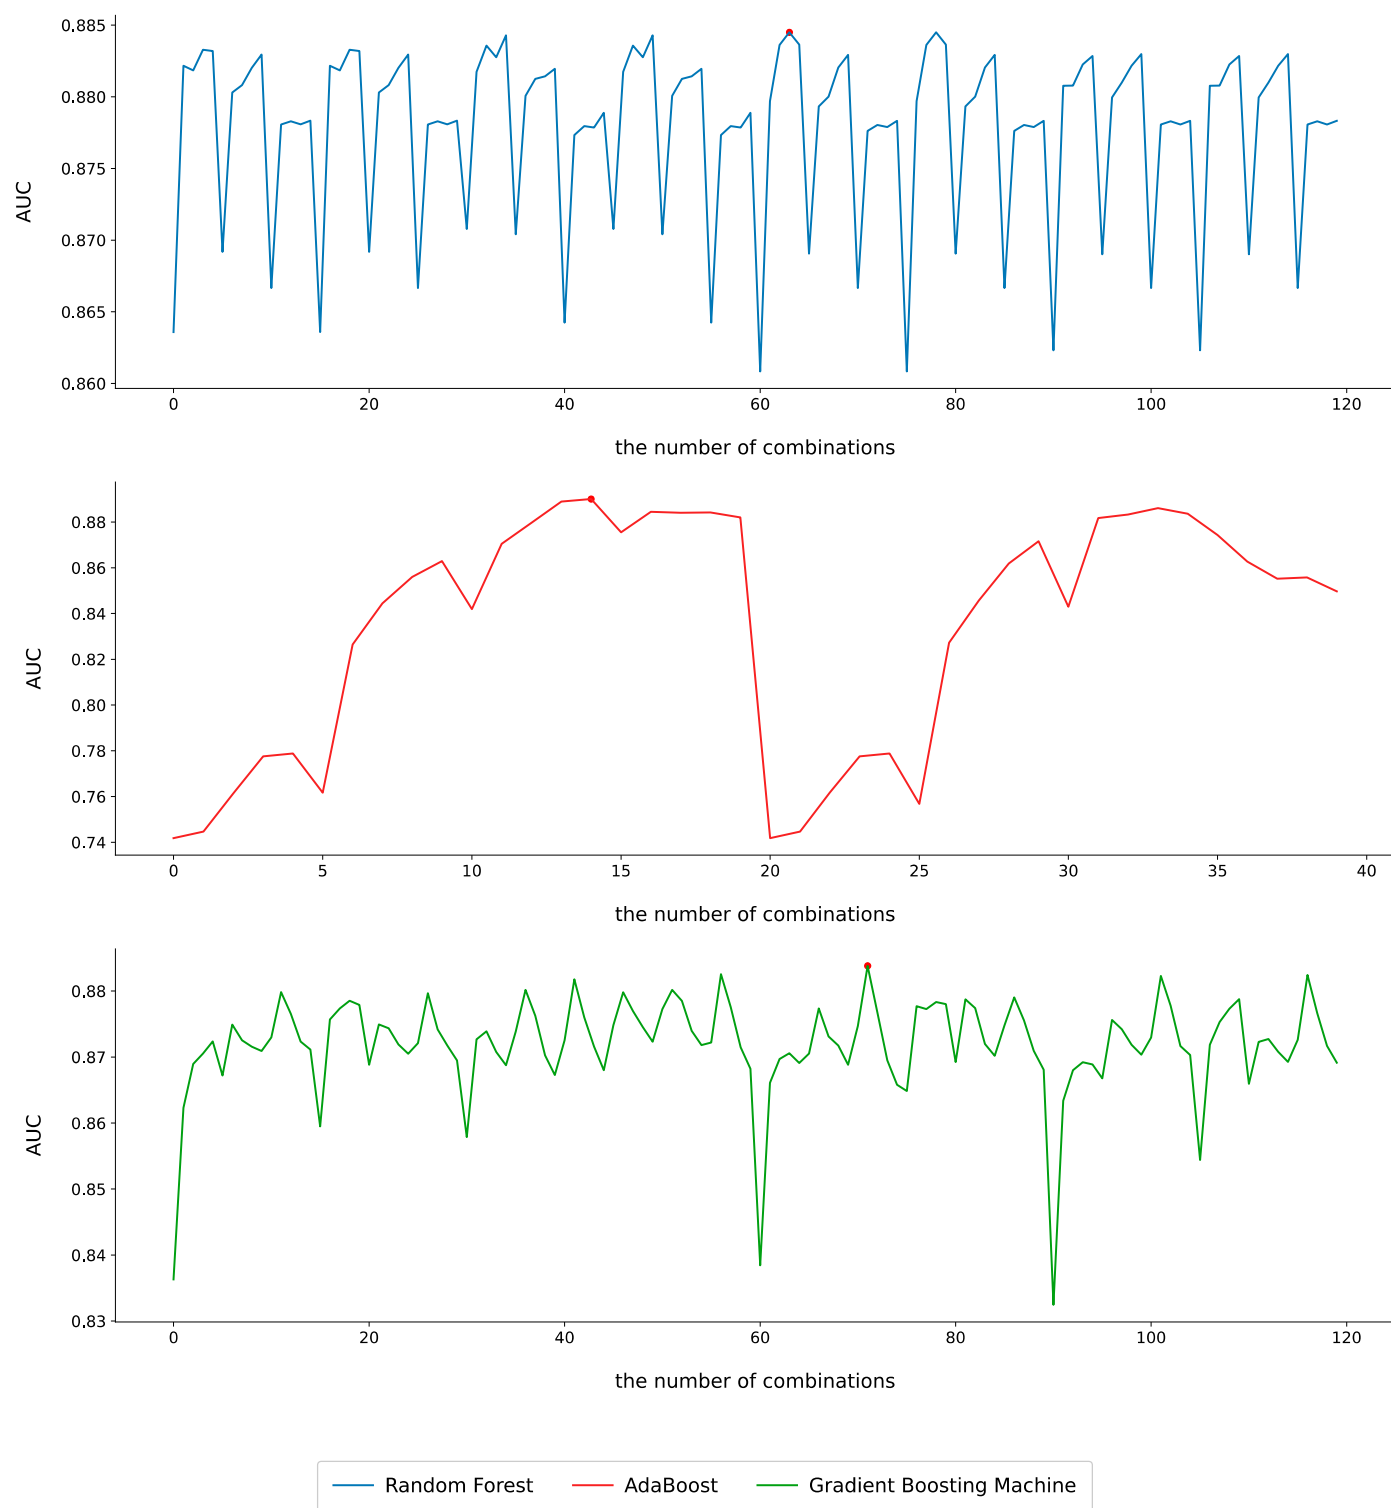

**Figure S1.** Machine Learning Curve for each best models using Grid search method; Random Forest, AdaBoost and Gradient Boosting Machine. A red dot indicates the combinations of hyperparameters that result in the best performance of each model.

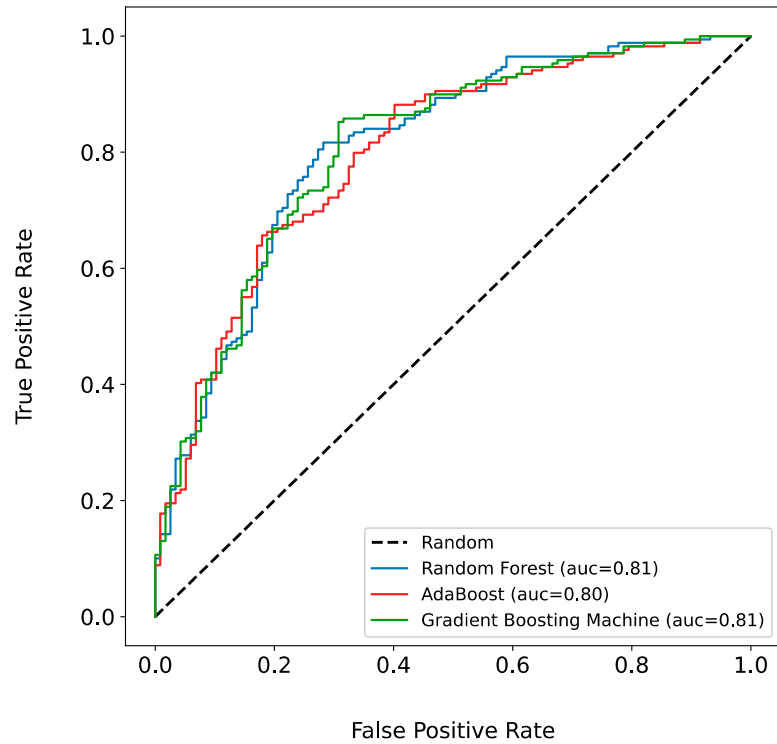

**Figure S2.** ROC (Receiver Operating Characteristic) Curve for three different best models (Random Forest, AdaBoost and Gradient Boosting Machine) based on 10 selected Checkup features.

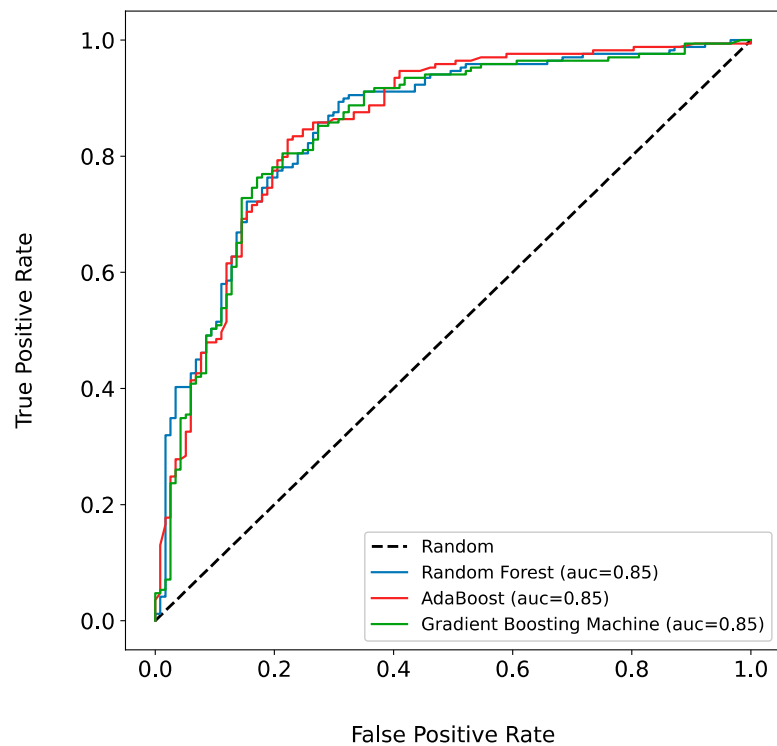

**Figure S3.** ROC (Receiver Operating Characteristic) Curve for three different best models (Random Forest, AdaBoost and Gradient Boosting Machine) based on 10 selected Survey features.

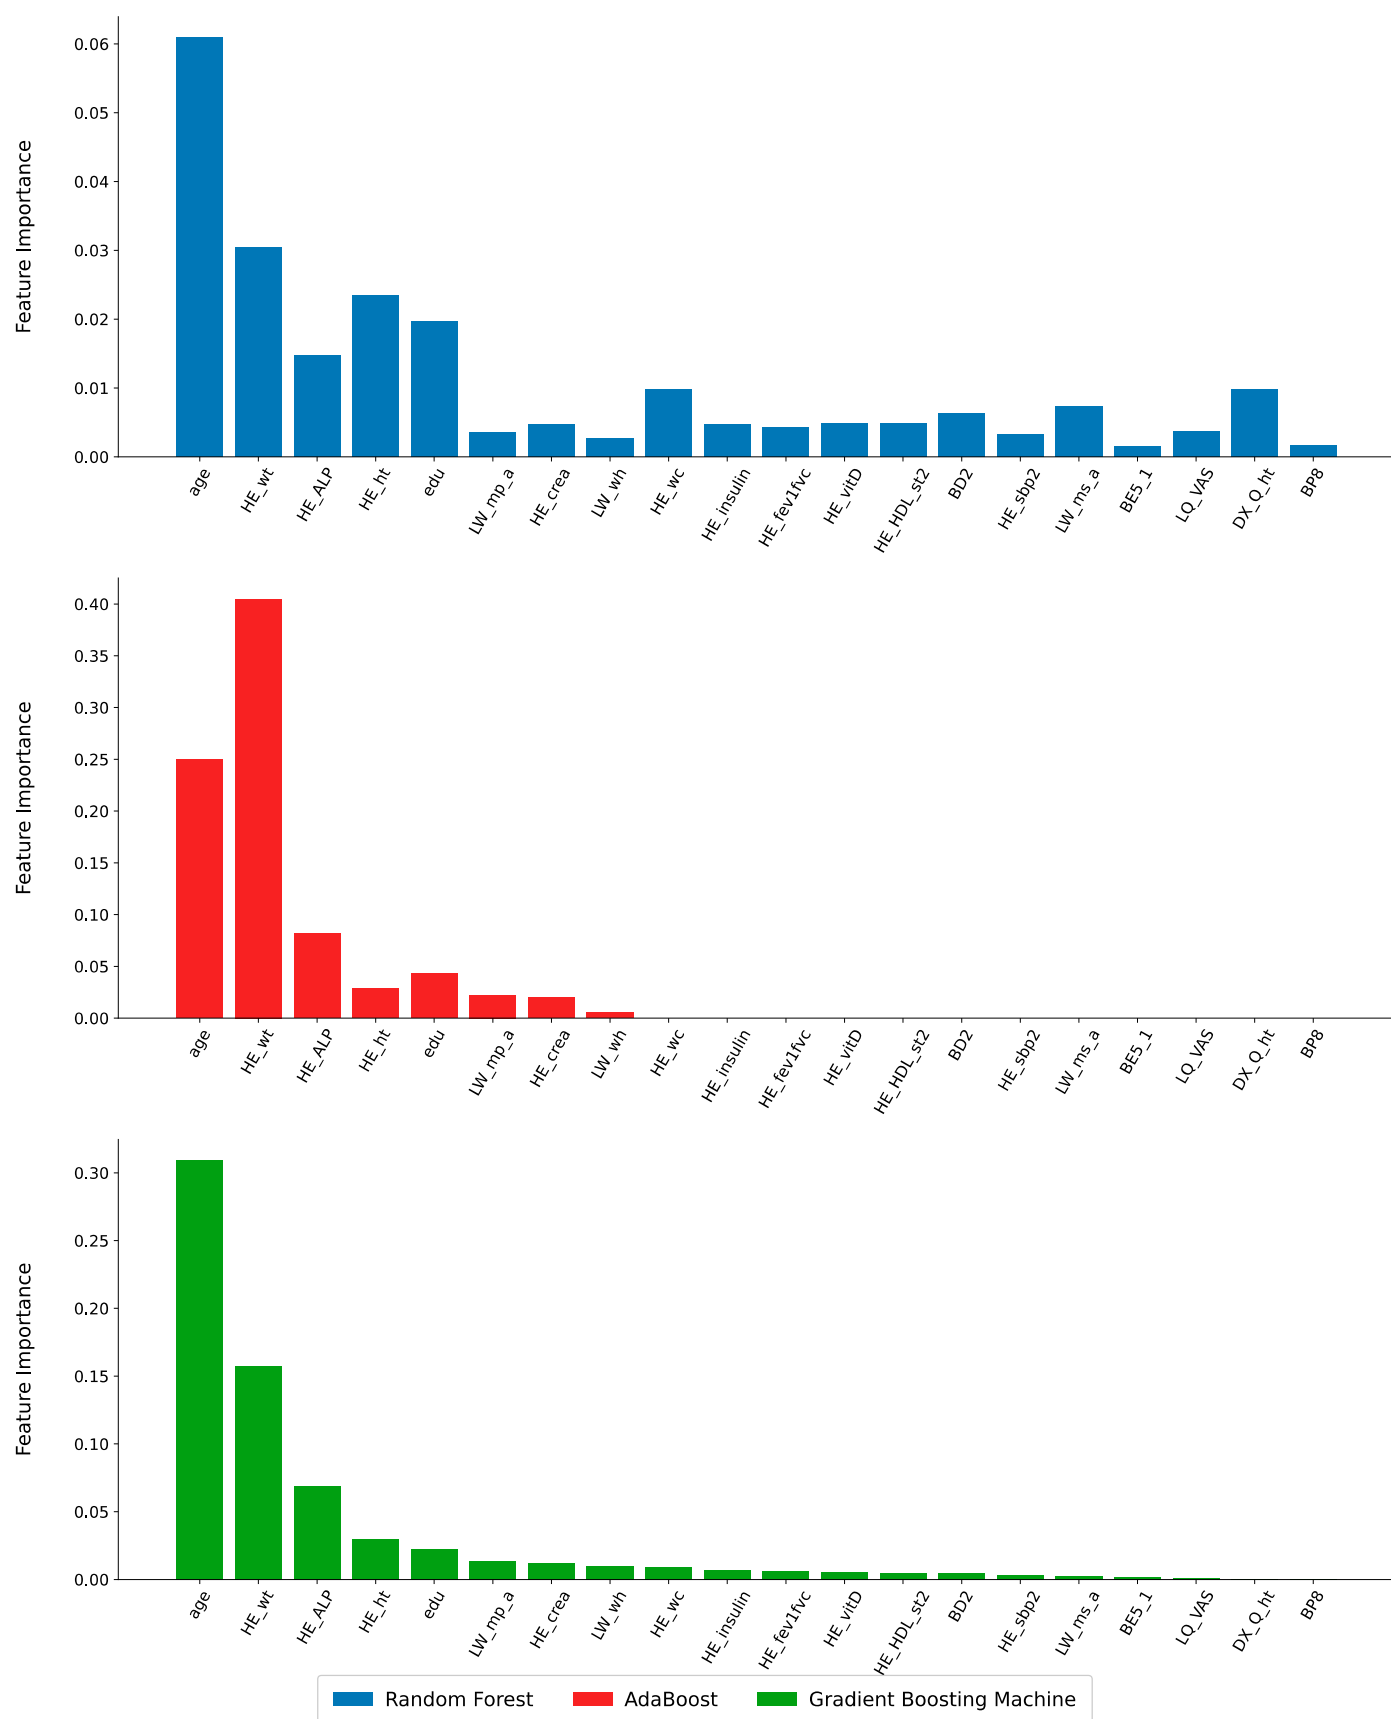

**Figure S4.** Feature importance bar graph for 20 features measured by three different ensemble machine learning models (Random Forest, AdaBoost and Gradient Boosting Machine).

**Table S1.** The number of normal and osteoporosis patients distributed in women

| Age range    | 0 ~ 39 | 40 ~ 49 | 50 ~ 59 | 60 ~ 69 | 70 ~ 79 | Over 80    |
|--------------|--------|---------|---------|---------|---------|------------|
| Normal       | 7      | 84      | 391     | 135     | 27      | 1          |
| Osteoporosis | 0      | 11      | 222     | 588     | 697     | <u>232</u> |

**Table S2.** Summary of the Model C's Performances on the test set (N =287).

| Model             | Accuracy | Precision | Recall | AUC          |
|-------------------|----------|-----------|--------|--------------|
| Random Forest     | 0.832    | 0.833     | 0.893  | 0.919        |
| AdaBoost          | 0.849    | 0.849     | 0.905  | <u>0.921</u> |
| Gradient Boosting | 0.829    | 0.844     | 0.869  | 0.908        |

\* Top performing model is underlined. AUC: Area Under the Curve. GBM: Gradient Boosting Machine
